# Supplementary material
Source: PubMed Central journal article supplement (PMC3562085)
Supplement: NIHMS434222-supplement-suppl2.pdf [file NIHMS434222-supplement-suppl2.pdf]

## Assessment of Healthcare Students Views on Pharmacogenomics

1. Are you a student or trainee at an academic institution?     Yes     No

1a. If **YES**, what is your academic position?

Undergraduate     PhD     Med Year 1     Med Year 2     Med Year 3     Residency

2. Have you taken a Genetics course in your post-high school career?     Yes     No

2a. If **YES**, did the course include information about the applications of genetics in pharmacy?     Yes     No

3. What healthcare setting have you worked in? (check all that apply)

Community/Retail                       Hospital                       Ambulatory/Outpatient  
 Research/Industry                       Other: \_\_\_\_\_

**Please respond to the following statements with Strongly Disagree, Disagree, Neutral, Agree, or Strongly Agree.**

| Statement                                                                                                     | Strongly Disagree        | Disagree                 | Neutral                  | Agree                    | Strongly Agree           |
|---------------------------------------------------------------------------------------------------------------|--------------------------|--------------------------|--------------------------|--------------------------|--------------------------|
| Pharmacogenomics should be an important part of Pharmacy School curriculums                                   | <input type="checkbox"/> |
| Pharmacogenomics is relevant to current medical practice                                                      | <input type="checkbox"/> |
| Pharmacogenomics will be relevant in future medical practice                                                  | <input type="checkbox"/> |
| Pharmacogenomics can improve patient care                                                                     | <input type="checkbox"/> |
| Pharmacogenomics is cost effective                                                                            | <input type="checkbox"/> |
| Pharmacogenomics can aid in optimizing medication therapy                                                     | <input type="checkbox"/> |
| Pharmacists should be required to have some comprehension of pharmacogenomics                                 | <input type="checkbox"/> |
| Once in practice, I should be able to answer patient questions on pharmacogenomics                            | <input type="checkbox"/> |
| Once in practice, I should be able to educate patients on the risks and benefits of pharmacogenomics testing. | <input type="checkbox"/> |
| Once in practice, I should be able to identify patients that could benefit from pharmacogenomics testing      | <input type="checkbox"/> |

**Please continue to the next page**

| Statement                                                                                                                           | Strongly Disagree        | Disagree                 | Neutral                  | Agree                    | Strongly Agree           |
|-------------------------------------------------------------------------------------------------------------------------------------|--------------------------|--------------------------|--------------------------|--------------------------|--------------------------|
| Once in practice, I should be able to provide drug therapy recommendations based on previously obtained patient genetic information | <input type="checkbox"/> |
| Once in practice, I should be able to identify medications that require pharmacogenomics testing                                    | <input type="checkbox"/> |
| I should have access to my patient's pharmacogenetic information in clinical practice                                               | <input type="checkbox"/> |
| I am comfortable interpreting information from a Pharmacogenomics test                                                              | <input type="checkbox"/> |
| I am comfortable answering questions on pharmacogenomics.                                                                           | <input type="checkbox"/> |
| I am comfortable educating patients on the risks and benefits of pharmacogenomics testing.                                          | <input type="checkbox"/> |
| I can apply information from a pharmacogenomics test to medication selection, dosing, or monitoring for a patient                   | <input type="checkbox"/> |
| I know which medications require pharmacogenomics testing                                                                           | <input type="checkbox"/> |
| Pharmacogenomics has been an important part of my Pharmacy School curriculum                                                        | <input type="checkbox"/> |

**Thank you for participating in our survey**
